# Supplementary material for: RBFOX2 recognizes N6-methyladenosine to suppress transcription and block myeloid leukaemia differentiation
Source: PubMed Central journal article supplement (PMC10495261; doi:10.1038/s41556-023-01213-w), 2023-08-28
Supplement: 41556_2023_1213_MOESM2_ESM.pdf [file 41556_2023_1213_MOESM2_ESM.pdf]

## Reporting Summary

Nature Portfolio wishes to improve the reproducibility of the work that we publish. This form provides structure for consistency and transparency in reporting. For further information on Nature Portfolio policies, see our [Editorial Policies](#) and the [Editorial Policy Checklist](#).

### Statistics

For all statistical analyses, confirm that the following items are present in the figure legend, table legend, main text, or Methods section.

n/a Confirmed

- The exact sample size ( $n$ ) for each experimental group/condition, given as a discrete number and unit of measurement
- A statement on whether measurements were taken from distinct samples or whether the same sample was measured repeatedly
- The statistical test(s) used AND whether they are one- or two-sided  
*Only common tests should be described solely by name; describe more complex techniques in the Methods section.*
- A description of all covariates tested
- A description of any assumptions or corrections, such as tests of normality and adjustment for multiple comparisons
- A full description of the statistical parameters including central tendency (e.g. means) or other basic estimates (e.g. regression coefficient) AND variation (e.g. standard deviation) or associated estimates of uncertainty (e.g. confidence intervals)
- For null hypothesis testing, the test statistic (e.g.  $F$ ,  $t$ ,  $r$ ) with confidence intervals, effect sizes, degrees of freedom and  $P$  value noted  
*Give  $P$  values as exact values whenever suitable.*
- For Bayesian analysis, information on the choice of priors and Markov chain Monte Carlo settings
- For hierarchical and complex designs, identification of the appropriate level for tests and full reporting of outcomes
- Estimates of effect sizes (e.g. Cohen's  $d$ , Pearson's  $r$ ), indicating how they were calculated

*Our web collection on [statistics for biologists](#) contains articles on many of the points above.*

### Software and code

Policy information about [availability of computer code](#)

Data collection

*Provide a description of all commercial, open source and custom code used to collect the data in this study, specifying the version used OR state that no software was used.*

Data analysis

Trimmomatic (version 0.39)  
FastQC (version 0.11.8)  
Flowjo (version 10)  
Cutadapt (version 2.10)  
BBMap (version 38.86)  
Hisat2 (version 2.1.0)  
Bowtie (version 1.0.0)  
Bowtie2 (version 2.4.1)  
STAR (version 2.7.3a)  
Samtools (version 1.9)  
HTSeq (version 0.12.4)  
DESeq2 (version 1.26.0)  
Homer (version 4.11)  
MACS2 (version 2.2.7.1)  
Bedtools (version 2.26)  
VarScan2 (version 2.3.9)  
DAVID 6.8 (Oct. 2016)  
Cytoscape (version 3.7.2)

ImageJ (version 1.52p)  
fastx\_toolkit ([http://hannonlab.cshl.edu/fastx\\_toolkit/](http://hannonlab.cshl.edu/fastx_toolkit/))

For manuscripts utilizing custom algorithms or software that are central to the research but not yet described in published literature, software must be made available to editors and reviewers. We strongly encourage code deposition in a community repository (e.g. GitHub). See the Nature Portfolio [guidelines for submitting code & software](#) for further information.

## Data

Policy information about [availability of data](#)

All manuscripts must include a [data availability statement](#). This statement should provide the following information, where applicable:

- Accession codes, unique identifiers, or web links for publicly available datasets
- A description of any restrictions on data availability
- For clinical datasets or third party data, please ensure that the statement adheres to our [policy](#)

Sequencing data that support the findings of this study have been deposited in the Gene Expression Omnibus (GEO) under accession code GSE205714. Previously published six data that were re-analysed here are available under accession code GSE105870, GSE106042, GSE175263, GSE88446, GSE80913, GSE88200. Source data are provided with this study. All other data supporting the findings of this study are available from the corresponding author on reasonable request.

## Human research participants

Policy information about [studies involving human research participants and Sex and Gender in Research](#).

|                             |                                                                                                                                                                                                                                                                                                                                                                                                                                                                                                                                                                     |
|-----------------------------|---------------------------------------------------------------------------------------------------------------------------------------------------------------------------------------------------------------------------------------------------------------------------------------------------------------------------------------------------------------------------------------------------------------------------------------------------------------------------------------------------------------------------------------------------------------------|
| Reporting on sex and gender | Has been reported in Han, Li et al., Cell Stem Cell, 2023 (PMID: 36608679)                                                                                                                                                                                                                                                                                                                                                                                                                                                                                          |
| Population characteristics  | Has been reported in Han, Li et al., Cell Stem Cell, 2023 (PMID: 36608679)                                                                                                                                                                                                                                                                                                                                                                                                                                                                                          |
| Recruitment                 | Has been reported in Han, Li et al., Cell Stem Cell, 2023 (PMID: 36608679)                                                                                                                                                                                                                                                                                                                                                                                                                                                                                          |
| Ethics oversight            | As previously reported in our publication (Han, Li et al., Cell Stem Cell, 2023, PMID: 36608679), human primary AML patient samples, as well as samples from healthy donors, were collected from bone marrow aspiration at City of Hope Hospital, Cincinnati Children's Hospital, or Dana-Farber/ Harvard Cancer Center. This collection was carried out in accordance with the approved protocol by the institutional review board (IRB, #18147), and written informed consent was obtained from the participants at the time of diagnosis, relapse, or remission. |

Note that full information on the approval of the study protocol must also be provided in the manuscript.

## Field-specific reporting

Please select the one below that is the best fit for your research. If you are not sure, read the appropriate sections before making your selection.

Life sciences       Behavioural & social sciences       Ecological, evolutionary & environmental sciences

For a reference copy of the document with all sections, see [nature.com/documents/nr-reporting-summary-flat.pdf](https://nature.com/documents/nr-reporting-summary-flat.pdf)

## Life sciences study design

All studies must disclose on these points even when the disclosure is negative.

|                 |                                                                                                                                                                                                                                                  |
|-----------------|--------------------------------------------------------------------------------------------------------------------------------------------------------------------------------------------------------------------------------------------------|
| Sample size     | No statistical methods were used to pre-determine sample sizes but our sample sizes are similar to those reported in our previous publications (Liu et al., Science, 2020, PMID: 31949099 and Shen et al., Cell Stem Cell, 2020, PMID: 32402250) |
| Data exclusions | No data were excluded from the analysis.                                                                                                                                                                                                         |
| Replication     | The experiments were repeated a minimum of three times, unless stated otherwise.                                                                                                                                                                 |
| Randomization   | Samples were allocated into experimental groups randomly.                                                                                                                                                                                        |
| Blinding        | The investigators were blinded to group allocation during data collection and analysis.                                                                                                                                                          |

## Reporting for specific materials, systems and methods

We require information from authors about some types of materials, experimental systems and methods used in many studies. Here, indicate whether each material, system or method listed is relevant to your study. If you are not sure if a list item applies to your research, read the appropriate section before selecting a response.

## Materials &amp; experimental systems

## Methods

| n/a                                 | Involved in the study                                           |
|-------------------------------------|-----------------------------------------------------------------|
| <input type="checkbox"/>            | <input checked="" type="checkbox"/> Antibodies                  |
| <input type="checkbox"/>            | <input checked="" type="checkbox"/> Eukaryotic cell lines       |
| <input checked="" type="checkbox"/> | <input type="checkbox"/> Palaeontology and archaeology          |
| <input type="checkbox"/>            | <input checked="" type="checkbox"/> Animals and other organisms |
| <input checked="" type="checkbox"/> | <input type="checkbox"/> Clinical data                          |
| <input checked="" type="checkbox"/> | <input type="checkbox"/> Dual use research of concern           |

| n/a                                 | Involved in the study                              |
|-------------------------------------|----------------------------------------------------|
| <input type="checkbox"/>            | <input checked="" type="checkbox"/> ChIP-seq       |
| <input type="checkbox"/>            | <input checked="" type="checkbox"/> Flow cytometry |
| <input checked="" type="checkbox"/> | <input type="checkbox"/> MRI-based neuroimaging    |

## Antibodies

## Antibodies used

Rabbit polyclonal anti-RBFOX2; Proteintech; Cat#12498-1-AP  
 Mouse monoclonal anti-RBFOX2; Abcam; Cat. #ab57154  
 Rabbit polyclonal anti-RBM15; Proteintech; Cat#10587-1-AP  
 Rabbit polyclonal anti-YTHDC1; Abcam; Cat#ab122340  
 Rabbit polyclonal anti-METTL14; Sigma-Aldrich; Cat#HPA038002  
 Rabbit monoclonal anti-METTL3; Abcam; Cat#ab195352; Clone#EPR18810  
 Rabbit polyclonal anti-EZH2; Cell Signaling Technology; Cat#5246; Clone#D2C9  
 Rabbit monoclonal anti-SUZ12; Cell Signaling Technology; Cat#3737; Clone# D39F6  
 HRP Goat Anti-Rabbit IgG (H+L); Cell Signaling Technology; Cat#7074  
 Mouse monoclonal Anti-Rabbit IgG light chain (HRP); Abcam; Cat#ab99697; Clone#SB62a  
 Rabbit IgG; Abcam; Cat#ab37415  
 Rabbit polyclonal anti-GST tag; Cell Signaling Technology; Cat#2622  
 Mouse monoclonal anti-his tag (HRP conjugate); Cell Signaling Technology; Cat#9991; Clone#27E8  
 Rabbit anti-H3K27me3; Cell Signaling Technology; Cat#9733; Clone# C36B11  
 Rabbit anti-H3K4me3; Cell Signaling Technology; Cat#9751; Clone# C42D8  
 Goat anti-Mouse IgG (H+L) Cross-Adsorbed Secondary Antibody, Alexa Fluor™ 647; Thermo Fisher Scientific; Cat#A-21235  
 Goat anti-Rabbit IgG (H+L) Cross-Adsorbed Secondary Antibody, Alexa Fluor™ 568; Thermo Fisher Scientific; Cat#A-11011  
 Rabbit anti-GAPDH (14C10) mAb (HRP Conjugate); Cell Signaling Technology; Cat#3683  
 Anti-Human CD11b, PE; BioLegend; Cat#101208  
 Anti-Human CD14, APC; eBioscience; Cat#17-0149-41  
 Anti-Human CD61, APC; eBioscience; Cat#17-0619-42

## Validation

Commercial antibodies were validated by the manufacturer (see below link).  
 RBFOX2 (<https://www.ptglab.com/products/RBM9-Antibody-12498-1-AP.htm>)  
 RBM15 (<https://www.ptglab.com/products/RBM15-Antibody-10587-1-AP.htm>)  
 YTHDC1 (<https://www.abcam.com/products/primary-antibodies/ythdc1-antibody-ab122340.html>)  
 METTL14 (<https://www.sigmaaldrich.com/US/en/product/sigma/hpa038002>)  
 METTL3 (<https://www.abcam.com/products/primary-antibodies/mettl3-antibody-epr18810-ab195352.html>)  
 EZH2 (<https://www.cellsignal.com/products/primary-antibodies/ezh2-d2c9-xp-rabbit-mab/5246>)  
 SUZ12 (<https://www.cellsignal.com/products/primary-antibodies/suz12-d39f6-xp-rabbit-mab/3737>)  
 HRP Goat Anti-Rabbit IgG (H+L) (<https://www.abcam.com/products/secondary-antibodies/rabbit-mouse-igg-hl-biotin-preadsorbed-ab7074.html>)  
 Mouse monoclonal Anti-Rabbit IgG light chain (HRP) (<https://www.abcam.com/products/secondary-antibodies/mouse-monoclonal-sb62a-rabbit-igg-light-chain-hrp-ab99697.html>)  
 Rabbit IgG (<https://www.abcam.com/products/primary-antibodies/rabbit-igg-polyclonal-isotype-control-ab37415.html>)  
 Rabbit polyclonal anti-GST tag (<https://www.cellsignal.com/products/primary-antibodies/gst-tag-antibody/2622>)  
 Mouse monoclonal anti-his tag (HRP conjugate) (<https://www.cellsignal.com/products/antibody-conjugates/his-tag-27e8-mouse-mab-hrp-conjugate/9991>)  
 Rabbit anti-H3K27me3 (<https://www.cellsignal.com/products/primary-antibodies/tri-methyl-histone-h3-lys27-c36b11-rabbit-mab/9733>)  
 Rabbit anti-H3K4me3 (<https://www.cellsignal.com/products/primary-antibodies/tri-methyl-histone-h3-lys4-c42d8-rabbit-mab/9751>)  
 Goat anti-Mouse IgG (H+L) Cross-Adsorbed Secondary Antibody (<https://www.thermofisher.com/antibody/product/Goat-anti-Mouse-IgG-H-L-Cross-Adsorbed-Secondary-Antibody-Polyclonal/A-21235>)  
 Goat anti-Rabbit IgG (H+L) Cross-Adsorbed Secondary Antibody (<https://www.thermofisher.com/antibody/product/Goat-anti-Rabbit-IgG-H-L-Cross-Adsorbed-Secondary-Antibody-Polyclonal/A-11011>)  
 Rabbit anti-GAPDH (14C10) mAb (HRP Conjugate) (<https://www.cellsignal.com/products/antibody-conjugates/gapdh-14c10-rabbit-mab-hrp-conjugate/3683>)  
 Anti-Human CD11b, PE (<https://www.biolegend.com/en-gb/antibodies-and-more/pe-anti-mouse-human-cd11b-antibody-349>)  
 Anti-Human CD14, APC (<https://www.labome.com/product/Invitrogen/11-0149-41.html>)  
 Anti-Human CD14, APC (<https://www.thermofisher.com/antibody/product/CD61-Integrin-beta-3-Antibody-clone-VI-PL2-Monoclonal/17-0619-42>)

## Eukaryotic cell lines

Policy information about [cell lines and Sex and Gender in Research](#)

## Cell line source(s)

K562 was obtained from America Type Culture Collection (ATCC).  
 Mono-mac-6, NOMO-1, MOLM13 and NB4 were obtained from DSMZ.  
 Lenti-X 293T was bought from Takara.

CD34+ HSPCs: We purchased the cord blood from StemCyte company with IRB protocol number 18147. We isolated the CD34+ HSPCs from the cord blood in the lab using CD34 MicroBead Kit, human (130-046-702, Miltenyi Biotech)

Authentication

The cell lines used were authenticated.

Mycoplasma contamination

All cell lines were tested negative for Mycoplasma contamination

Commonly misidentified lines  
(See [ICLAC](#) register)

No misidentified cell lines were used in this study.

## Animals and other research organisms

Policy information about [studies involving animals](#); [ARRIVE guidelines](#) recommended for reporting animal research, and [Sex and Gender in Research](#)

Laboratory animals

NRG-SGM3 (NRGS, RRID: IMSR\_JAX:024099) mice from Jackson laboratory.  
For each experiment, 6- to 8-week-old mice were used and randomly allocated to each group.

Wild animals

No wild animals were used

Reporting on sex

Similar number of male and female mice aged 6-8 weeks were used in the human AML cells xenograft studies. Based on our knowledge, sex and leukemogenesis of human AML cells in NRGS mice are not relevant. We didn't observe significant difference in leukemogenesis and survival between male and female mice.

Field-collected samples

The mice were bred at the specific-pathogen-free core facilities of City of Hope according to standard procedures. All animal studies listed below were conducted in accordance with federal and state government guidelines and IACUC protocols (#17089) approved by City of Hope. No field collected samples were used in the study.

Ethics oversight

All animal studies were conducted in accordance with federal and state government guidelines and IACUC protocols (#17089) approved by City of Hope

Note that full information on the approval of the study protocol must also be provided in the manuscript.

## ChIP-seq

### Data deposition

Confirm that both raw and final processed data have been deposited in a public database such as [GEO](#).

Confirm that you have deposited or provided access to graph files (e.g. BED files) for the called peaks.

Data access links

*May remain private before publication.*

<https://www.ncbi.nlm.nih.gov/geo/query/acc.cgi?acc=GSE205714>

Files in database submission

fastq file of K562, Control, H3K4me3, r1, b1, ChIP-seq  
 fastq file of K562, Control, H3K4me3, r2, b1, ChIP-seq  
 fastq file of K562, RBFOX2 KD, H3K4me3, r1, b1, ChIP-seq  
 fastq file of K562, RBFOX2 KD, H3K4me3, r2, b1, ChIP-seq  
 fastq file of K562, Control, Input, r1, b1, ChIP-seq  
 fastq file of K562, Control, Input, r2, b1, ChIP-seq  
 fastq file of K562, RBFOX2 KD, Input, r1, b1, ChIP-seq  
 fastq file of K562, RBFOX2 KD, Input, r2, b1, ChIP-seq  
 fastq file of K562, Control, SUZ12, r1, b2, ChIP-seq  
 fastq file of K562, Control, SUZ12, r2, b2, ChIP-seq  
 fastq file of K562, RBFOX2 KD, SUZ12, r1, b2, ChIP-seq  
 fastq file of K562, RBFOX2 KD, SUZ12, r2, b2, ChIP-seq  
 fastq file of K562, Control, Input, r1, b2, ChIP-seq  
 fastq file of K562, Control, Input, r2, b2, ChIP-seq  
 fastq file of K562, RBFOX2 KD, Input, r1, b2, ChIP-seq  
 fastq file of K562, RBFOX2 KD, Input, r2, b2, ChIP-seq  
 fastq file of K562, Control, H3K27me3, r1, b3, ChIP-seq  
 fastq file of K562, Control, H3K27me3, r2, b3, ChIP-seq  
 fastq file of K562, RBFOX2 KD, H3K27me3, r1, b3, ChIP-seq  
 fastq file of K562, RBFOX2 KD, H3K27me3, r2, b3, ChIP-seq  
 fastq file of K562, Control, Input, r1, b3, ChIP-seq  
 fastq file of K562, Control, Input, r2, b3, ChIP-seq  
 fastq file of K562, RBFOX2 KD, Input, r1, b3, ChIP-seq  
 fastq file of K562, RBFOX2 KD, Input, r2, b3, ChIP-seq  
 fastq file of K562, Control, YTHDC1, r1, b4, ChIP-seq  
 fastq file of K562, Control, YTHDC1, r2, b4, ChIP-seq  
 fastq file of K562, Control, RBM15, r1, b4, ChIP-seq  
 fastq file of K562, Control, RBM15, r2, b4, ChIP-seq  
 fastq file of K562, RBFOX2 KD, RBM15, r1, b4, ChIP-seq  
 fastq file of K562, RBFOX2 KD, RBM15, r2, b4, ChIP-seq

fastq file of K562, Control, Input, r1, b4, ChIP-seq  
 fastq file of K562, Control, Input, r2, b4, ChIP-seq  
 fastq file of K562, RBFOX2 KD, Input, r1, b4, ChIP-seq  
 fastq file of K562, RBFOX2 KD, Input, r2, b4, ChIP-seq  
 fastq file of K562, siControl, EZH2, r1, b4, ChIP-seq  
 fastq file of K562, siControl, EZH2, r2, b4, ChIP-seq  
 fastq file of K562, siControl, SUZ12, r1, b4, ChIP-seq  
 fastq file of K562, siControl, SUZ12, r2, b4, ChIP-seq  
 fastq file of K562, siYTHDC1 KD, EZH2, r1, b4, ChIP-seq  
 fastq file of K562, siYTHDC1 KD, EZH2, r2, b4, ChIP-seq  
 fastq file of K562, siYTHDC1 KD, SUZ12, r1, b4, ChIP-seq  
 fastq file of K562, siYTHDC1 KD, SUZ12, r2, b4, ChIP-seq  
 fastq file of K562, siControl, Input, r1, b4, ChIP-seq  
 fastq file of K562, siControl, Input, r2, b4, ChIP-seq  
 fastq file of K562, siYTHDC1 KD, Input, r1, b4, ChIP-seq  
 fastq file of K562, siYTHDC1 KD, Input, r2, b4, ChIP-seq  
 fastq file of K562, siControl, Input, r1, b5, ChIP-seq  
 fastq file of K562, siControl, Input, r2, b5, ChIP-seq  
 fastq file of K562, siControl, RBFOX2, r1, b5, ChIP-seq  
 fastq file of K562, siControl, RBFOX2, r2, b5, ChIP-seq  
 fastq file of K562, siMETTL3 KD, Input, r1, b5, ChIP-seq  
 fastq file of K562, siMETTL3 KD, Input, r2, b5, ChIP-seq  
 fastq file of K562, siMETTL3 KD, RBFOX2, r1, b5, ChIP-seq  
 fastq file of K562, siMETTL3 KD, RBFOX2, r2, b5, ChIP-seq  
 fastq file of K562, siRBM15 KD, Input, r1, b5, ChIP-seq  
 fastq file of K562, siRBM15 KD, Input, r2, b5, ChIP-seq  
 fastq file of K562, siRBM15 KD, RBFOX2, r1, b5, ChIP-seq  
 fastq file of K562, siRBM15 KD, RBFOX2, r2, b5, ChIP-seq  
 fastq file of K562, siControl, RBM15, r1, b5, ChIP-seq  
 fastq file of K562, siControl, RBM15, r2, b5, ChIP-seq  
 fastq file of K562, siYTHDC1 KD, Input, r1, b5, ChIP-seq  
 fastq file of K562, siYTHDC1 KD, Input, r2, b5, ChIP-seq  
 fastq file of K562, siYTHDC1 KD, RBFOX2, r1, b5, ChIP-seq  
 fastq file of K562, siYTHDC1 KD, RBFOX2, r2, b5, ChIP-seq  
 fastq file of K562, siYTHDC1 KD, RBM15, r1, b5, ChIP-seq  
 fastq file of K562, siYTHDC1 KD, RBM15, r2, b5, ChIP-seq  
 fastq file of K562, WT, Input, r1, b6, ChIP-seq  
 fastq file of K562, WT, Input, r2, b6, ChIP-seq  
 fastq file of K562, WT, METTL14, r1, b6, ChIP-seq  
 fastq file of K562, WT, METTL14, r2, b6, ChIP-seq  
 fastq file of K562, WT, METTL3, r1, b7, ChIP-seq  
 fastq file of K562, WT, METTL3, r2, b7, ChIP-seq  
 fastq file of NB4, RBFOX2 OE, Input, r1, b8, ChIP-seq  
 fastq file of NB4, RBFOX2 OE, RBFOX2, r1, b8, ChIP-seq

bigWig file of K562, Control, H3K4me3, r1, b1, ChIP-seq  
 bigWig file of K562, Control, H3K4me3, r2, b1, ChIP-seq  
 bigWig file of K562, RBFOX2 KD, H3K4me3, r1, b1, ChIP-seq  
 bigWig file of K562, RBFOX2 KD, H3K4me3, r2, b1, ChIP-seq  
 bigWig file of K562, Control, Input, r1, b1, ChIP-seq  
 bigWig file of K562, Control, Input, r2, b1, ChIP-seq  
 bigWig file of K562, RBFOX2 KD, Input, r1, b1, ChIP-seq  
 bigWig file of K562, RBFOX2 KD, Input, r2, b1, ChIP-seq  
 bigWig file of K562, Control, SUZ12, r1, b2, ChIP-seq  
 bigWig file of K562, Control, SUZ12, r2, b2, ChIP-seq  
 bigWig file of K562, RBFOX2 KD, SUZ12, r1, b2, ChIP-seq  
 bigWig file of K562, RBFOX2 KD, SUZ12, r2, b2, ChIP-seq  
 bigWig file of K562, Control, Input, r1, b2, ChIP-seq  
 bigWig file of K562, Control, Input, r2, b2, ChIP-seq  
 bigWig file of K562, RBFOX2 KD, Input, r1, b2, ChIP-seq  
 bigWig file of K562, RBFOX2 KD, Input, r2, b2, ChIP-seq  
 bigWig file of K562, Control, H3K27me3, r1, b3, ChIP-seq  
 bigWig file of K562, Control, H3K27me3, r2, b3, ChIP-seq  
 bigWig file of K562, RBFOX2 KD, H3K27me3, r1, b3, ChIP-seq  
 bigWig file of K562, RBFOX2 KD, H3K27me3, r2, b3, ChIP-seq  
 bigWig file of K562, Control, Input, r1, b3, ChIP-seq  
 bigWig file of K562, Control, Input, r2, b3, ChIP-seq  
 bigWig file of K562, RBFOX2 KD, Input, r1, b3, ChIP-seq  
 bigWig file of K562, RBFOX2 KD, Input, r2, b3, ChIP-seq  
 bigWig file of K562, Control, YTHDC1, r1, b4, ChIP-seq  
 bigWig file of K562, Control, YTHDC1, r2, b4, ChIP-seq  
 bigWig file of K562, Control, RBM15, r1, b4, ChIP-seq  
 bigWig file of K562, Control, RBM15, r2, b4, ChIP-seq  
 bigWig file of K562, RBFOX2 KD, RBM15, r1, b4, ChIP-seq  
 bigWig file of K562, RBFOX2 KD, RBM15, r2, b4, ChIP-seq  
 bigWig file of K562, Control, Input, r1, b4, ChIP-seq

bigWig file of K562, Control, Input, r2, b4, ChIP-seq  
 bigWig file of K562, RBFOX2 KD, Input, r1, b4, ChIP-seq  
 bigWig file of K562, RBFOX2 KD, Input, r2, b4, ChIP-seq  
 bigWig file of K562, siControl, EZH2, r1, b4, ChIP-seq  
 bigWig file of K562, siControl, EZH2, r2, b4, ChIP-seq  
 bigWig file of K562, siControl, SUZ12, r1, b4, ChIP-seq  
 bigWig file of K562, siControl, SUZ12, r2, b4, ChIP-seq  
 bigWig file of K562, siYTHDC1 KD, EZH2, r1, b4, ChIP-seq  
 bigWig file of K562, siYTHDC1 KD, EZH2, r2, b4, ChIP-seq  
 bigWig file of K562, siYTHDC1 KD, SUZ12, r1, b4, ChIP-seq  
 bigWig file of K562, siYTHDC1 KD, SUZ12, r2, b4, ChIP-seq  
 bigWig file of K562, siControl, Input, r1, b4, ChIP-seq  
 bigWig file of K562, siControl, Input, r2, b4, ChIP-seq  
 bigWig file of K562, siYTHDC1 KD, Input, r1, b4, ChIP-seq  
 bigWig file of K562, siYTHDC1 KD, Input, r2, b4, ChIP-seq  
 bigWig file of K562, siControl, Input, r1, b5, ChIP-seq  
 bigWig file of K562, siControl, Input, r2, b5, ChIP-seq  
 bigWig file of K562, siControl, RBFOX2, r1, b5, ChIP-seq  
 bigWig file of K562, siControl, RBFOX2, r2, b5, ChIP-seq  
 bigWig file of K562, siMETTL3 KD, Input, r1, b5, ChIP-seq  
 bigWig file of K562, siMETTL3 KD, Input, r2, b5, ChIP-seq  
 bigWig file of K562, siMETTL3 KD, RBFOX2, r1, b5, ChIP-seq  
 bigWig file of K562, siMETTL3 KD, RBFOX2, r2, b5, ChIP-seq  
 bigWig file of K562, siRBM15 KD, Input, r1, b5, ChIP-seq  
 bigWig file of K562, siRBM15 KD, Input, r2, b5, ChIP-seq  
 bigWig file of K562, siRBM15 KD, RBFOX2, r1, b5, ChIP-seq  
 bigWig file of K562, siRBM15 KD, RBFOX2, r2, b5, ChIP-seq  
 bigWig file of K562, siControl, RBM15, r1, b5, ChIP-seq  
 bigWig file of K562, siControl, RBM15, r2, b5, ChIP-seq  
 bigWig file of K562, siYTHDC1 KD, Input, r1, b5, ChIP-seq  
 bigWig file of K562, siYTHDC1 KD, Input, r2, b5, ChIP-seq  
 bigWig file of K562, siYTHDC1 KD, RBFOX2, r1, b5, ChIP-seq  
 bigWig file of K562, siYTHDC1 KD, RBFOX2, r2, b5, ChIP-seq  
 bigWig file of K562, siYTHDC1 KD, RBM15, r1, b5, ChIP-seq  
 bigWig file of K562, siYTHDC1 KD, RBM15, r2, b5, ChIP-seq  
 bigWig file of K562, WT, Input, r1, b6, ChIP-seq  
 bigWig file of K562, WT, Input, r2, b6, ChIP-seq  
 bigWig file of K562, WT, METTL14, r1, b6, ChIP-seq  
 bigWig file of K562, WT, METTL14, r2, b6, ChIP-seq  
 bigWig file of K562, WT, METTL3, r1, b7, ChIP-seq  
 bigWig file of K562, WT, METTL3, r2, b7, ChIP-seq  
 bigWig file of NB4, RBFOX2 OE, Input, r1, b8, ChIP-seq  
 bigWig file of NB4, RBFOX2 OE, RBFOX2, r1, b8, ChIP-seq

Genome browser session  
 (e.g. [UCSC](#))

no longer applicable

## Methodology

Replicates

Each sequencing experiment were with two replicates.

Sequencing depth

K562, Control, H3K4me3, r1, b1, ChIP-seq ; 37119667 ; 35890869 ; 121bp ; single-end  
 K562, Control, H3K4me3, r2, b1, ChIP-seq ; 34142328 ; 33327205 ; 121bp ; single-end  
 K562, RBFOX2 KD, H3K4me3, r1, b1, ChIP-seq ; 37801427 ; 36588595 ; 121bp ; single-end  
 K562, RBFOX2 KD, H3K4me3, r2, b1, ChIP-seq ; 34944031 ; 34014554 ; 121bp ; single-end  
 K562, Control, Input, r1, b1, ChIP-seq ; 5887480 ; 4959227 ; 121bp ; single-end  
 K562, Control, Input, r2, b1, ChIP-seq ; 8648256 ; 7692745 ; 121bp ; single-end  
 K562, RBFOX2 KD, Input, r1, b1, ChIP-seq ; 6971243 ; 5888660 ; 121bp ; single-end  
 K562, RBFOX2 KD, Input, r2, b1, ChIP-seq ; 8544057 ; 7286914 ; 121bp ; single-end  
 K562, Control, SUZ12, r1, b2, ChIP-seq ; 42488664 ; 41660218 ; 121bp ; single-end  
 K562, Control, SUZ12, r2, b2, ChIP-seq ; 35683931 ; 33274887 ; 121bp ; single-end  
 K562, RBFOX2 KD, SUZ12, r1, b2, ChIP-seq ; 27464275 ; 28826168 ; 121bp ; single-end  
 K562, RBFOX2 KD, SUZ12, r2, b2, ChIP-seq ; 35555679 ; 23951498 ; 121bp ; single-end  
 K562, Control, Input, r1, b2, ChIP-seq ; 29101890 ; 26758410 ; 121bp ; single-end  
 K562, Control, Input, r2, b2, ChIP-seq ; 24195690 ; 34956464 ; 121bp ; single-end  
 K562, RBFOX2 KD, Input, r1, b2, ChIP-seq ; 25933304 ; 25664996 ; 121bp ; single-end  
 K562, RBFOX2 KD, Input, r2, b2, ChIP-seq ; 27639912 ; 27390507 ; 121bp ; single-end  
 K562, Control, H3K27me3, r1, b3, ChIP-seq ; 23881346 ; 23576751 ; 121bp ; single-end  
 K562, Control, H3K27me3, r2, b3, ChIP-seq ; 20173278 ; 19939445 ; 121bp ; single-end  
 K562, RBFOX2 KD, H3K27me3, r1, b3, ChIP-seq ; 32851239 ; 32473448 ; 121bp ; single-end  
 K562, RBFOX2 KD, H3K27me3, r2, b3, ChIP-seq ; 26929209 ; 26605131 ; 121bp ; single-end  
 K562, Control, Input, r1, b3, ChIP-seq ; 17288460 ; 16918980 ; 121bp ; single-end  
 K562, Control, Input, r2, b3, ChIP-seq ; 21028333 ; 20379447 ; 121bp ; single-end  
 K562, RBFOX2 KD, Input, r1, b3, ChIP-seq ; 25148103 ; 24495308 ; 121bp ; single-end  
 K562, RBFOX2 KD, Input, r2, b3, ChIP-seq ; 20758998 ; 20223473 ; 121bp ; single-end  
 K562, Control, YTHDC1, r1, b4, ChIP-seq ; 46025341 ; 42828791 ; 121bp ; single-end

K562, Control, YTHDC1, r2, b4, ChIP-seq ; 40961547 ; 37857116 ; 121bp ; single-end  
 K562, Control, RBM15, r1, b4, ChIP-seq ; 41593999 ; 39054952 ; 121bp ; single-end  
 K562, Control, RBM15, r2, b4, ChIP-seq ; 51469669 ; 47700781 ; 121bp ; single-end  
 K562, RBFOX2 KD, RBM15, r1, b4, ChIP-seq ; 41730533 ; 39126183 ; 121bp ; single-end  
 K562, RBFOX2 KD, RBM15, r2, b4, ChIP-seq ; 39956909 ; 37212944 ; 121bp ; single-end  
 K562, Control, Input, r1, b4, ChIP-seq ; 46964617 ; 46320775 ; 121bp ; single-end  
 K562, Control, Input, r2, b4, ChIP-seq ; 38684782 ; 38173937 ; 121bp ; single-end  
 K562, RBFOX2 KD, Input, r1, b4, ChIP-seq ; 42784780 ; 42348929 ; 121bp ; single-end  
 K562, RBFOX2 KD, Input, r2, b4, ChIP-seq ; 36112804 ; 35715728 ; 121bp ; single-end  
 K562, siControl, EZH2, r1, b4, ChIP-seq ; 59446318 ; 58151554 ; 121bp ; single-end  
 K562, siControl, EZH2, r2, b4, ChIP-seq ; 51039350 ; 49962559 ; 121bp ; single-end  
 K562, siControl, SUZ12, r1, b4, ChIP-seq ; 40221126 ; 39310505 ; 121bp ; single-end  
 K562, siControl, SUZ12, r2, b4, ChIP-seq ; 40107659 ; 38988864 ; 121bp ; single-end  
 K562, siYTHDC1 KD, EZH2, r1, b4, ChIP-seq ; 36021950 ; 35221208 ; 121bp ; single-end  
 K562, siYTHDC1 KD, EZH2, r2, b4, ChIP-seq ; 57269403 ; 55998110 ; 121bp ; single-end  
 K562, siYTHDC1 KD, SUZ12, r1, b4, ChIP-seq ; 50584003 ; 49307505 ; 121bp ; single-end  
 K562, siYTHDC1 KD, SUZ12, r2, b4, ChIP-seq ; 36953023 ; 35876269 ; 121bp ; single-end  
 K562, siControl, Input, r1, b4, ChIP-seq ; 40841348 ; 40365577 ; 121bp ; single-end  
 K562, siControl, Input, r2, b4, ChIP-seq ; 44270350 ; 43688291 ; 121bp ; single-end  
 K562, siYTHDC1 KD, Input, r1, b4, ChIP-seq ; 44028779 ; 43570161 ; 121bp ; single-end  
 K562, siYTHDC1 KD, Input, r2, b4, ChIP-seq ; 37278876 ; 36880855 ; 121bp ; single-end  
 K562, siControl, Input, r1, b5, ChIP-seq ; 32637379 ; 32128033 ; 80-132bp ; single-end  
 K562, siControl, Input, r2, b5, ChIP-seq ; 27034271 ; 26571640 ; 80-132bp ; single-end  
 K562, siControl, RBFOX2, r1, b5, ChIP-seq ; 26922511 ; 22180459 ; 80-132bp ; single-end  
 K562, siControl, RBFOX2, r2, b5, ChIP-seq ; 26451078 ; 22106491 ; 80-132bp ; single-end  
 K562, siMETTL3 KD, Input, r1, b5, ChIP-seq ; 62260128 ; 61510620 ; 80-132bp ; single-end  
 K562, siMETTL3 KD, Input, r2, b5, ChIP-seq ; 32850548 ; 32349561 ; 80-132bp ; single-end  
 K562, siMETTL3 KD, RBFOX2, r1, b5, ChIP-seq ; 30096051 ; 23790230 ; 80-132bp ; single-end  
 K562, siMETTL3 KD, RBFOX2, r2, b5, ChIP-seq ; 37907727 ; 29369571 ; 80-132bp ; single-end  
 K562, siRBM15 KD, Input, r1, b5, ChIP-seq ; 71740918 ; 70891909 ; 80-132bp ; single-end  
 K562, siRBM15 KD, Input, r2, b5, ChIP-seq ; 59650966 ; 58904328 ; 80-132bp ; single-end  
 K562, siRBM15 KD, RBFOX2, r1, b5, ChIP-seq ; 24884729 ; 19451216 ; 80-132bp ; single-end  
 K562, siRBM15 KD, RBFOX2, r2, b5, ChIP-seq ; 29259845 ; 22006354 ; 80-132bp ; single-end  
 K562, siControl, RBM15, r1, b5, ChIP-seq ; 26287815 ; 23754643 ; 80-132bp ; single-end  
 K562, siControl, RBM15, r2, b5, ChIP-seq ; 26222506 ; 23547930 ; 80-132bp ; single-end  
 K562, siYTHDC1 KD, Input, r1, b5, ChIP-seq ; 28112069 ; 27631454 ; 80-132bp ; single-end  
 K562, siYTHDC1 KD, Input, r2, b5, ChIP-seq ; 60141528 ; 59350379 ; 80-132bp ; single-end  
 K562, siYTHDC1 KD, RBFOX2, r1, b5, ChIP-seq ; 27516855 ; 21918955 ; 80-132bp ; single-end  
 K562, siYTHDC1 KD, RBFOX2, r2, b5, ChIP-seq ; 34290272 ; 27132816 ; 80-132bp ; single-end  
 K562, siYTHDC1 KD, RBM15, r1, b5, ChIP-seq ; 32575846 ; 28506599 ; 80-132bp ; single-end  
 K562, siYTHDC1 KD, RBM15, r2, b5, ChIP-seq ; 32084743 ; 28267011 ; 80-132bp ; single-end  
 K562, WT, Input, r1, b6, ChIP-seq ; 29389016 ; 28879999 ; 80-132bp ; single-end  
 K562, WT, Input, r2, b6, ChIP-seq ; 32344546 ; 31825696 ; 80-132bp ; single-end  
 K562, WT, METTL14, r1, b6, ChIP-seq ; 18750184 ; 16618783 ; 80-132bp ; single-end  
 K562, WT, METTL14, r2, b6, ChIP-seq ; 22206633 ; 20115545 ; 80-132bp ; single-end  
 K562, WT, METTL3, r1, b7, ChIP-seq ; 11162286 ; 10618258 ; 80-132bp ; single-end  
 K562, WT, METTL3, r2, b7, ChIP-seq ; 12567440 ; 11873800 ; 80-132bp ; single-end  
 NB4, RBFOX2 OE, Input, r1, b8, ChIP-seq ; 23094095 ; 20453021 ; 80-132bp ; single-end  
 NB4, RBFOX2 OE, RBFOX2, r1, b8, ChIP-seq ; 47424887 ; 38840282 ; 80-132bp ; single-end

## Antibodies

Rabbit polyclonal anti-RBM15; Proteintech; Cat#10587-1-AP  
 Rabbit polyclonal anti-YTHDC1; Abcam; Cat#ab122340  
 Rabbit polyclonal anti-EZH2; Cell Signaling Technology; Cat#5246  
 Rabbit monoclonal anti-SUZ12; Cell Signaling Technology; Cat#3737  
 Rabbit anti-H3K27me3; Cell Signaling Technology; Cat#9733  
 Rabbit anti-H3K4me3; Cell Signaling Technology; Cat#9751  
 Rabbit polyclonal anti-METTL14; Sigma-Aldrich; Cat#HPA038002  
 Rabbit monoclonal anti-METTL3; Abcam; Cat#ab195352  
 Rabbit polyclonal anti-RBFOX2; Proteintech; Cat#12498-1-AP

## Peak calling parameters

Peaks were called using HOMER in histone (for histone modification ChIP-seq) or factor (for transcriptional factor ChIP-seq) mode with default parameters.

## Data quality

Multiple QC checks were performed throughout the analysis including FastQC, reads distribution and duplication rate estimation.

## Software

Raw reads were trimmed with Trimmomatic-0.39 (version 0.39)  
 Trimmed reads were mapped with bowtie2 (version 2.4.1).  
 Duplicated reads were removed with samtools (version 1.9)  
 Peaks were called using HOMER (version 4.11)

## Plots

Confirm that:

- The axis labels state the marker and fluorochrome used (e.g. CD4-FITC).
- The axis scales are clearly visible. Include numbers along axes only for bottom left plot of group (a 'group' is an analysis of identical markers).
- All plots are contour plots with outliers or pseudocolor plots.
- A numerical value for number of cells or percentage (with statistics) is provided.

## Methodology

Sample preparation

Cells with different treatments were harvested and washed with chilled PBS, then incubated with anti-human Fc receptor binding inhibitor antibody for 10 min at 4 degree, followed by staining with flow antibodies for 25 minutes at 4 degree in the dark. After washing with FACS buffer once, stained cells were either analyzed immediately or fixed first and detected later

Instrument

BD LSRFortessa or FACSAria III analyzer (BD Biosciences).

Software

Diva (BD Bioscience) software was used to collect data. Flowjo was used to analyze the flow data

Cell population abundance

No cell sorting was applied

Gating strategy

FSC-A/SSC-A was used to gate cell population, then FSC-H/FSC-A was used to gate singlets population and DAPI/FSC-A was used to gate live cells for further analysis.

- Tick this box to confirm that a figure exemplifying the gating strategy is provided in the Supplementary Information.
